# Supplementary material for: Preclinical findings: The pharmacological targets and molecular mechanisms of ferulic acid treatment for COVID-19 and osteosarcoma via targeting autophagy
Source: Front Endocrinol (Lausanne). 2022 Sep 20;13:971687. doi: 10.3389/fendo.2022.971687 (PMC9530469; doi:10.3389/fendo.2022.971687)
Supplement: Supplementary file 1 [file Table_1.xlsx]

## Sheet: Sheet1
pathway	gene	interaction
GO:0034504	MAPK1	bp
GO:0034504	PIK3R1	bp
GO:0034504	STAT3	bp
GO:0034504	PARP1	bp
GO:1901653	TLR4	bp
GO:1901653	PIK3R1	bp
GO:1901653	STAT3	bp
GO:1901653	PARP1	bp
GO:0048708	MAPK1	bp
GO:0048708	TLR4	bp
GO:0048708	STAT3	bp
GO:0030099	TLR4	bp
GO:0030099	PIK3R1	bp
GO:0030099	STAT3	bp
GO:0030099	PARP1	bp
GO:1900182	MAPK1	bp
GO:1900182	PIK3R1	bp
GO:1900182	PARP1	bp
GO:0032760	TLR4	bp
GO:0032760	PIK3R1	bp
GO:0032760	STAT3	bp
GO:1903557	TLR4	bp
GO:1903557	PIK3R1	bp
GO:1903557	STAT3	bp
GO:1900180	MAPK1	bp
GO:1900180	PIK3R1	bp
GO:1900180	PARP1	bp
GO:0006606	MAPK1	bp
GO:0006606	PIK3R1	bp
GO:0006606	STAT3	bp
GO:0051170	MAPK1	bp
GO:0051170	PIK3R1	bp
GO:0051170	STAT3	bp
GO:0014069	MAPK1	cc
GO:0014069	STAT3	cc
GO:0032279	MAPK1	cc
GO:0032279	STAT3	cc
GO:0099572	MAPK1	cc
GO:0099572	STAT3	cc
GO:0098984	MAPK1	cc
GO:0098984	STAT3	cc
GO:0005769	MAPK1	cc
GO:0005769	TLR4	cc
GO:0005667	STAT3	cc
GO:0005667	PARP1	cc
GO:0031143	MAPK1	cc
GO:0097038	PIK3R1	cc
GO:0001891	TLR4	cc
GO:0005942	PIK3R1	cc
GO:0019902	MAPK1	mf
GO:0019902	PIK3R1	mf
GO:0019902	STAT3	mf
GO:0001784	MAPK1	mf
GO:0001784	PIK3R1	mf
GO:0045309	MAPK1	mf
GO:0045309	PIK3R1	mf
GO:0035591	PIK3R1	mf
GO:0035591	STAT3	mf
GO:0051219	MAPK1	mf
GO:0051219	PIK3R1	mf
GO:0016922	STAT3	mf
GO:0016922	PARP1	mf
GO:0019903	PIK3R1	mf
GO:0019903	STAT3	mf
GO:0005126	PIK3R1	mf
GO:0005126	STAT3	mf
GO:0030674	PIK3R1	mf
GO:0030674	STAT3	mf
GO:0061629	STAT3	mf
GO:0061629	PARP1	mf
hsa04066	MAPK1	kegg
hsa04066	TLR4	kegg
hsa04066	PIK3R1	kegg
hsa04066	STAT3	kegg
hsa01521	MAPK1	kegg
hsa01521	PIK3R1	kegg
hsa01521	STAT3	kegg
hsa04620	MAPK1	kegg
hsa04620	TLR4	kegg
hsa04620	PIK3R1	kegg
hsa04068	MAPK1	kegg
hsa04068	PIK3R1	kegg
hsa04068	STAT3	kegg
hsa04210	MAPK1	kegg
hsa04210	PIK3R1	kegg
hsa04210	PARP1	kegg
hsa04550	MAPK1	kegg
hsa04550	PIK3R1	kegg
hsa04550	STAT3	kegg
hsa04217	TLR4	kegg
hsa04217	STAT3	kegg
hsa04217	PARP1	kegg
hsa04613	MAPK1	kegg
hsa04613	TLR4	kegg
hsa04613	PIK3R1	kegg
hsa04062	MAPK1	kegg
hsa04062	PIK3R1	kegg
hsa04062	STAT3	kegg
hsa04370	MAPK1	kegg
hsa04370	PIK3R1	kegg
Ferulic acid-Autophapy	MAPK1	drug
Ferulic acid-Autophapy	TLR4	drug
Ferulic acid-Autophapy	PIK3R1	drug
Ferulic acid-Autophapy	STAT3	drug
Ferulic acid-Autophapy	PARP1	drug
Osteosarcoma-COVID-19	MAPK1	disease
Osteosarcoma-COVID-19	TLR4	disease
Osteosarcoma-COVID-19	PIK3R1	disease
Osteosarcoma-COVID-19	STAT3	disease
Osteosarcoma-COVID-19	PARP1	disease
